# Supplementary material
Source: PubMed Central journal article supplement (PMC3389233)

## SUPPLEMENTARY DATA

### **Bisubstrate analogue inhibitors of 6-hydroxymethyl-7,8-dihydropterin pyrophosphokinase: New lead exhibits a distinct binding mode**

Genbin Shi <sup>a</sup>, Gary Shaw <sup>a</sup>, Yue Li <sup>b</sup>, Yan Wu <sup>b</sup>, Honggao Yan <sup>b</sup>, and Xinhua Ji <sup>a,\*</sup>

<sup>a</sup> *Macromolecular Crystallography Laboratory, National Cancer Institute, Frederick, MD  
21702, USA*

<sup>b</sup> *Department of Biochemistry and Molecular Biology, Michigan State University, East Lansing,  
MI 48824, USA*

\* Corresponding author. Tel: +1 (301) 846-5035; Fax: +1 (301) 846-6073.

E-mail address: [jix@mail.nih.gov](mailto:jix@mail.nih.gov) (X. Ji).

*Keywords:* Antibacterial; Bisubstrate; Folate; HPPK; Pterin

## Table of Contents

|                                                                                                                |     |
|----------------------------------------------------------------------------------------------------------------|-----|
| <b>Figure S1.</b> IR Spectrum of Compound <b>3</b> .....                                                       | S3  |
| <b>Figure S2.</b> IR Spectrum of Compound <b>4</b> .....                                                       | S4  |
| <b>Figure S3.</b> IR Spectrum of Compound <b>9</b> .....                                                       | S5  |
| <b>Figure S4.</b> $^1\text{H}$ NMR Spectrum of Compound <b>3</b> at 400 MHz in $\text{CD}_3\text{OD}$ .....    | S6  |
| <b>Figure S5.</b> $^{13}\text{C}$ NMR Spectrum of Compound <b>3</b> at 100 MHz in $\text{CD}_3\text{OD}$ ..... | S7  |
| <b>Figure S6.</b> $^1\text{H}$ NMR Spectrum of Compound <b>4</b> at 400 MHz in $\text{CD}_3\text{OD}$ .....    | S8  |
| <b>Figure S7.</b> $^{13}\text{C}$ NMR Spectrum of Compound <b>4</b> at 100 MHz in $\text{CD}_3\text{OD}$ ..... | S9  |
| <b>Figure S8.</b> $^1\text{H}$ NMR Spectrum of Compound <b>9</b> at 400 MHz in $\text{CD}_3\text{OD}$ .....    | S10 |
| <b>Figure S9.</b> $^{13}\text{C}$ NMR Spectrum of Compound <b>9</b> at 100 MHz in $\text{DMSO-}d_6$ .....      | S11 |

**Figure S1.** IR Spectrum of Compound **3**

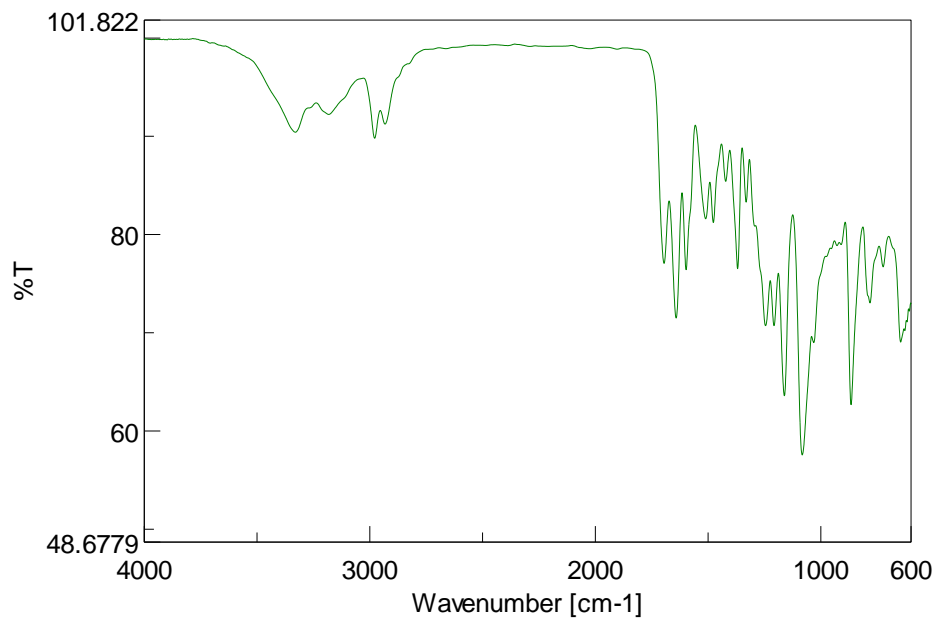

**Figure S2.** IR Spectrum of Compound **4**

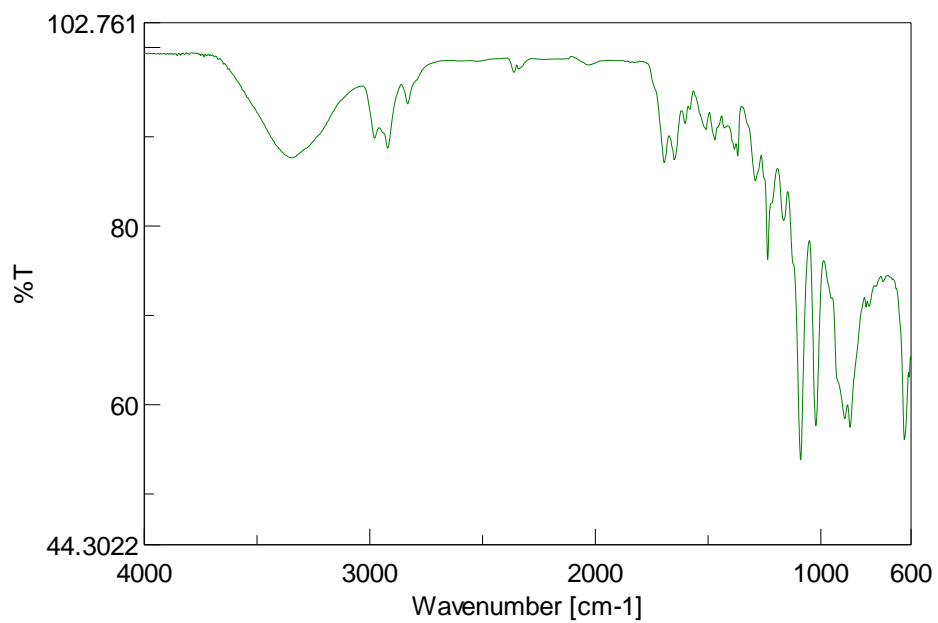

**Figure S3.** IR Spectrum of Compound **9**

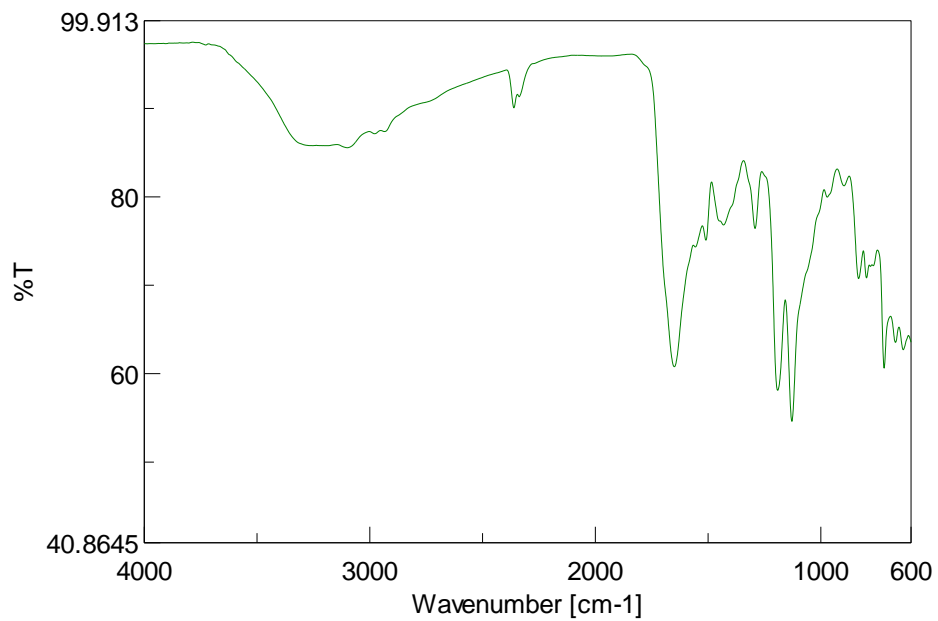

**Figure S4.**  $^1\text{H}$  NMR Spectrum of Compound **3** at 400 MHz in  $\text{CD}_3\text{OD}$

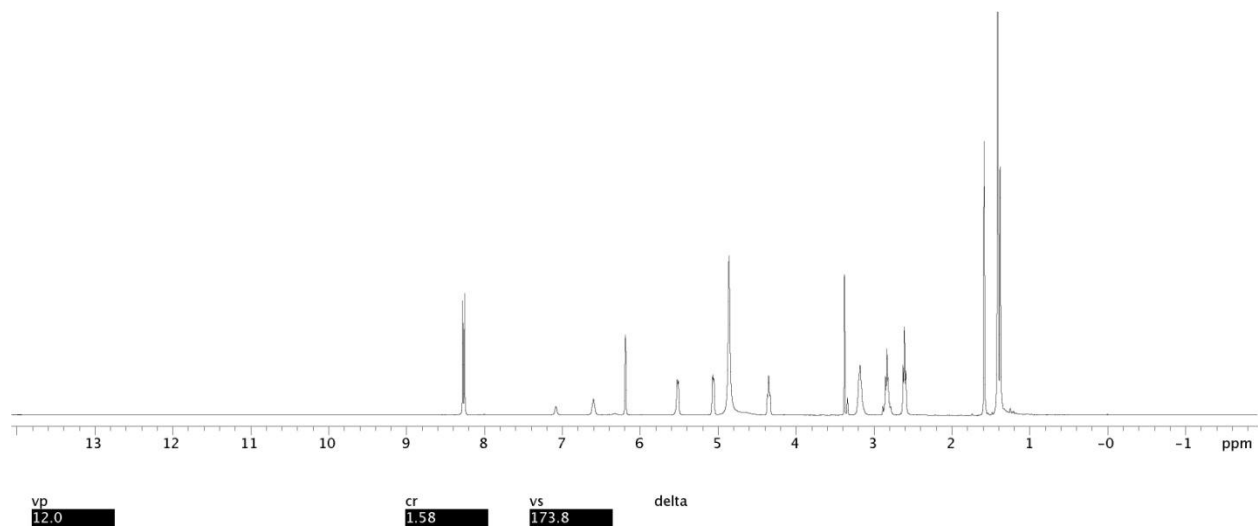

**Figure S5.**  $^{13}\text{C}$  NMR Spectrum of Compound **3** at 100 MHz in  $\text{CD}_3\text{OD}$

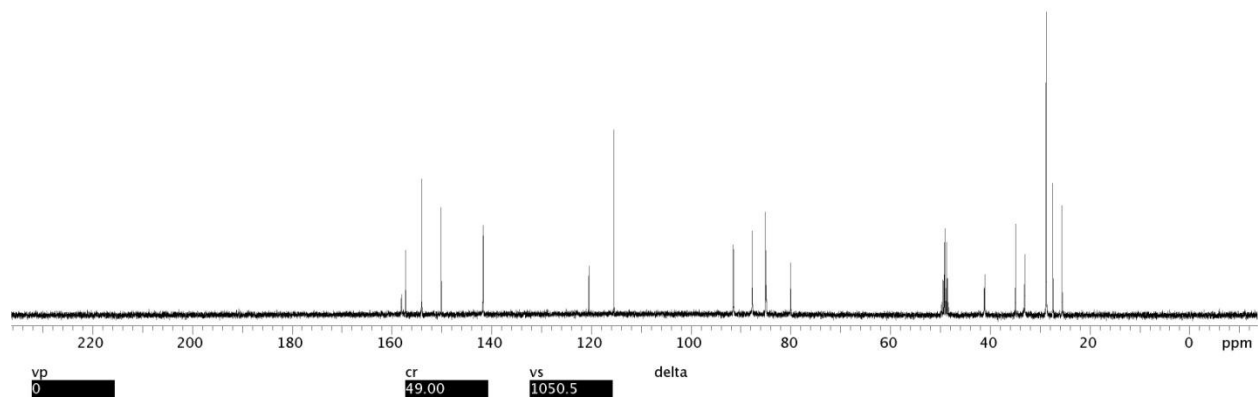

**Figure S6.**  $^1\text{H}$  NMR Spectrum of Compound **4** at 400 MHz in  $\text{CD}_3\text{OD}$

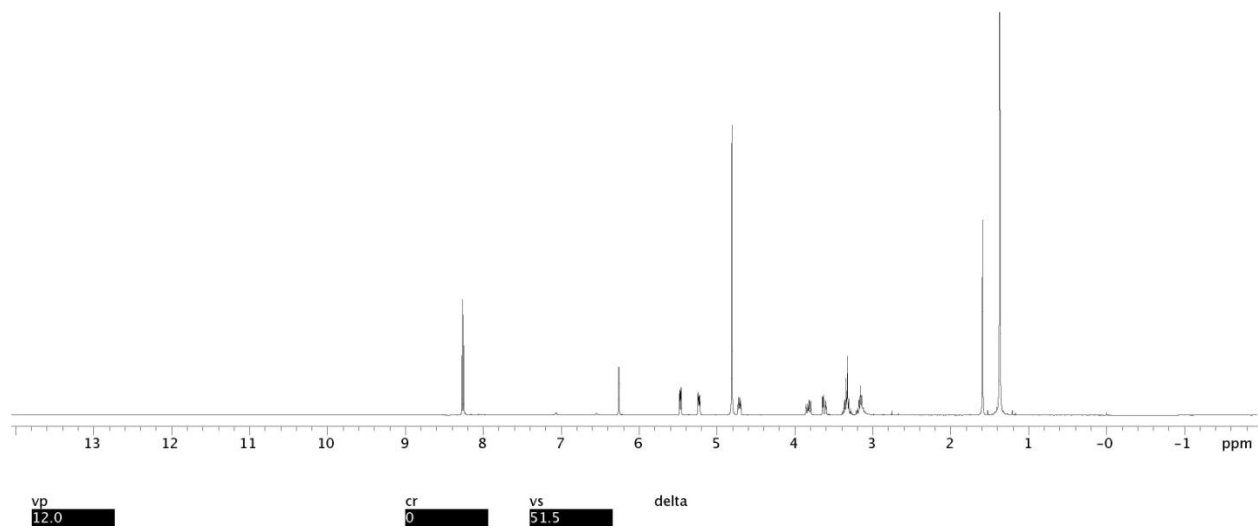



**Figure S7.**  $^{13}\text{C}$  NMR Spectrum of Compound **4** at 100 MHz in  $\text{CD}_3\text{OD}$

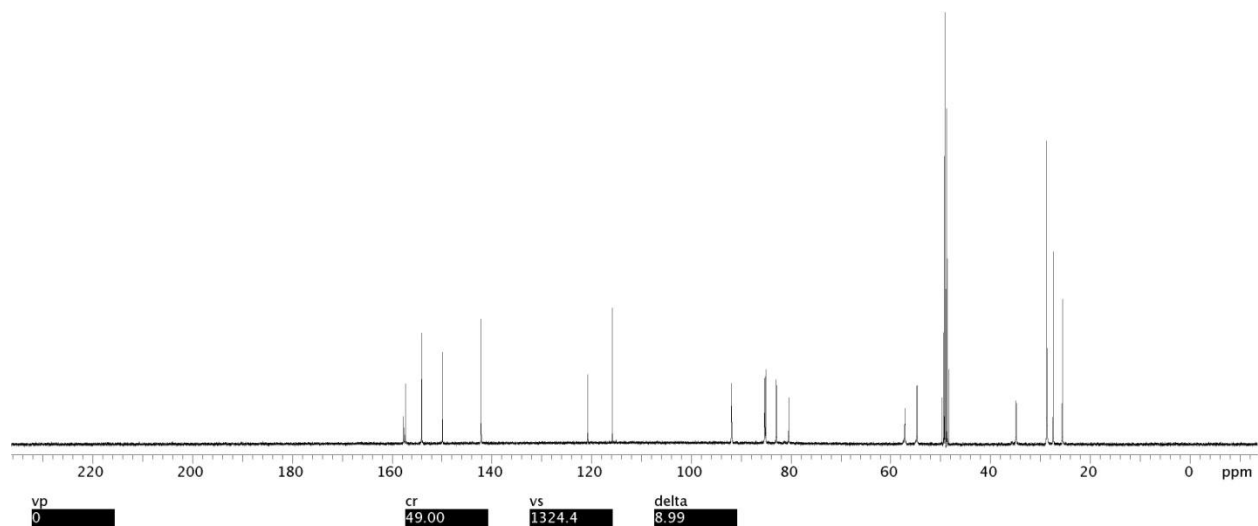

**Figure S8.**  $^1\text{H}$  NMR Spectrum of Compound **9** at 400 MHz in  $\text{CD}_3\text{OD}$

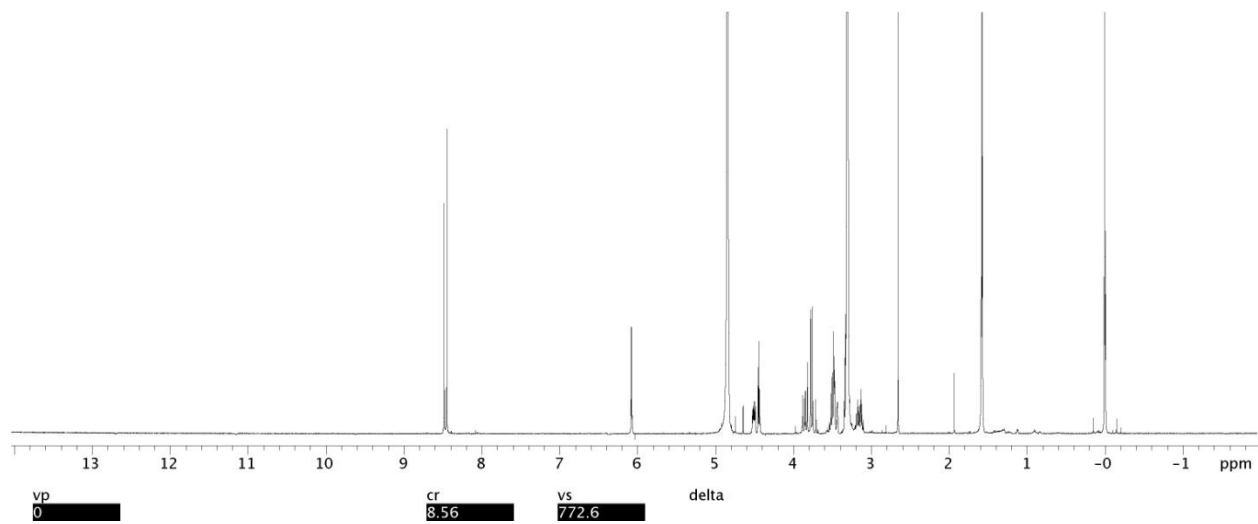

**Figure S9.**  $^{13}\text{C}$  NMR Spectrum of Compound **9** at 100 MHz in  $\text{DMSO-d}_6$

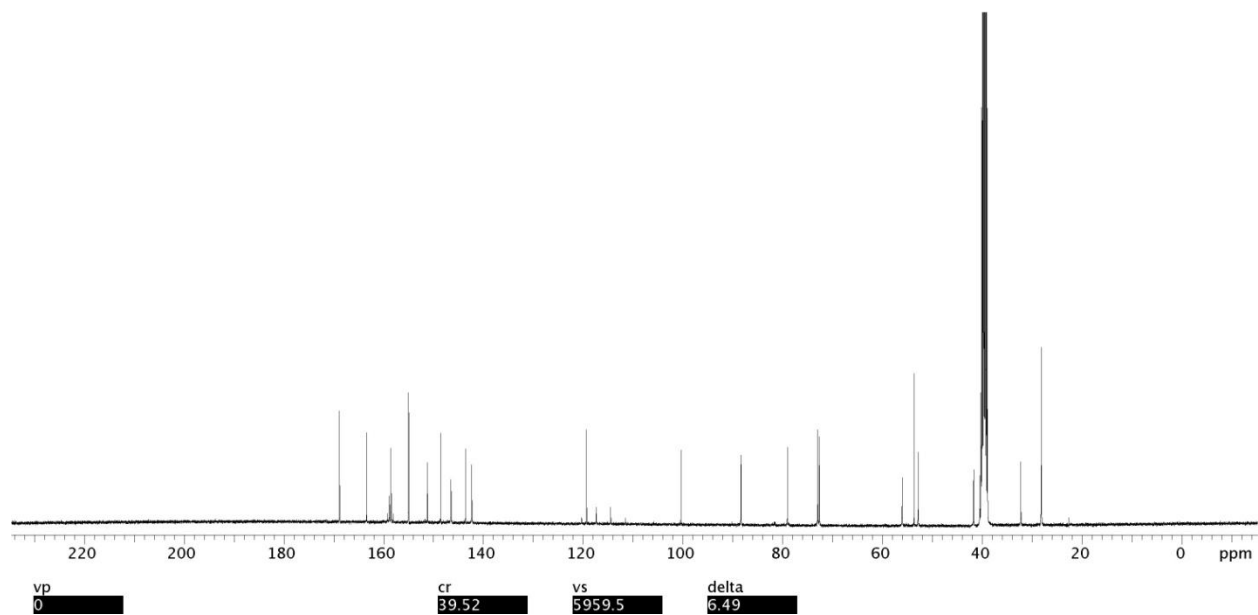

Supplement: NIHMS383140-supplement-01.pdf [file NIHMS383140-supplement-01.pdf]
